# Supplementary material
Source: PubMed Central journal article supplement (PMC7385987)
Supplement: mmc1.pdf [file mmc1.pdf]

## Supplementary material

### **Early spring near-surface ozone in Europe during the COVID-19 shutdown: meteorological effects outweigh emission changes**

Carlos Ordóñez<sup>1</sup>, Jose M. Garrido-Perez<sup>1,2</sup>, Ricardo García-Herrera<sup>1,2</sup>

<sup>1</sup>Dpto. Física de la Tierra y Astrofísica, Universidad Complutense de Madrid, Madrid, Spain.

<sup>2</sup>Instituto de Geociencias (IGEO), CSIC-UCM, Madrid, Spain

Corresponding author: [carlordo@ucm.es](mailto:carlordo@ucm.es)

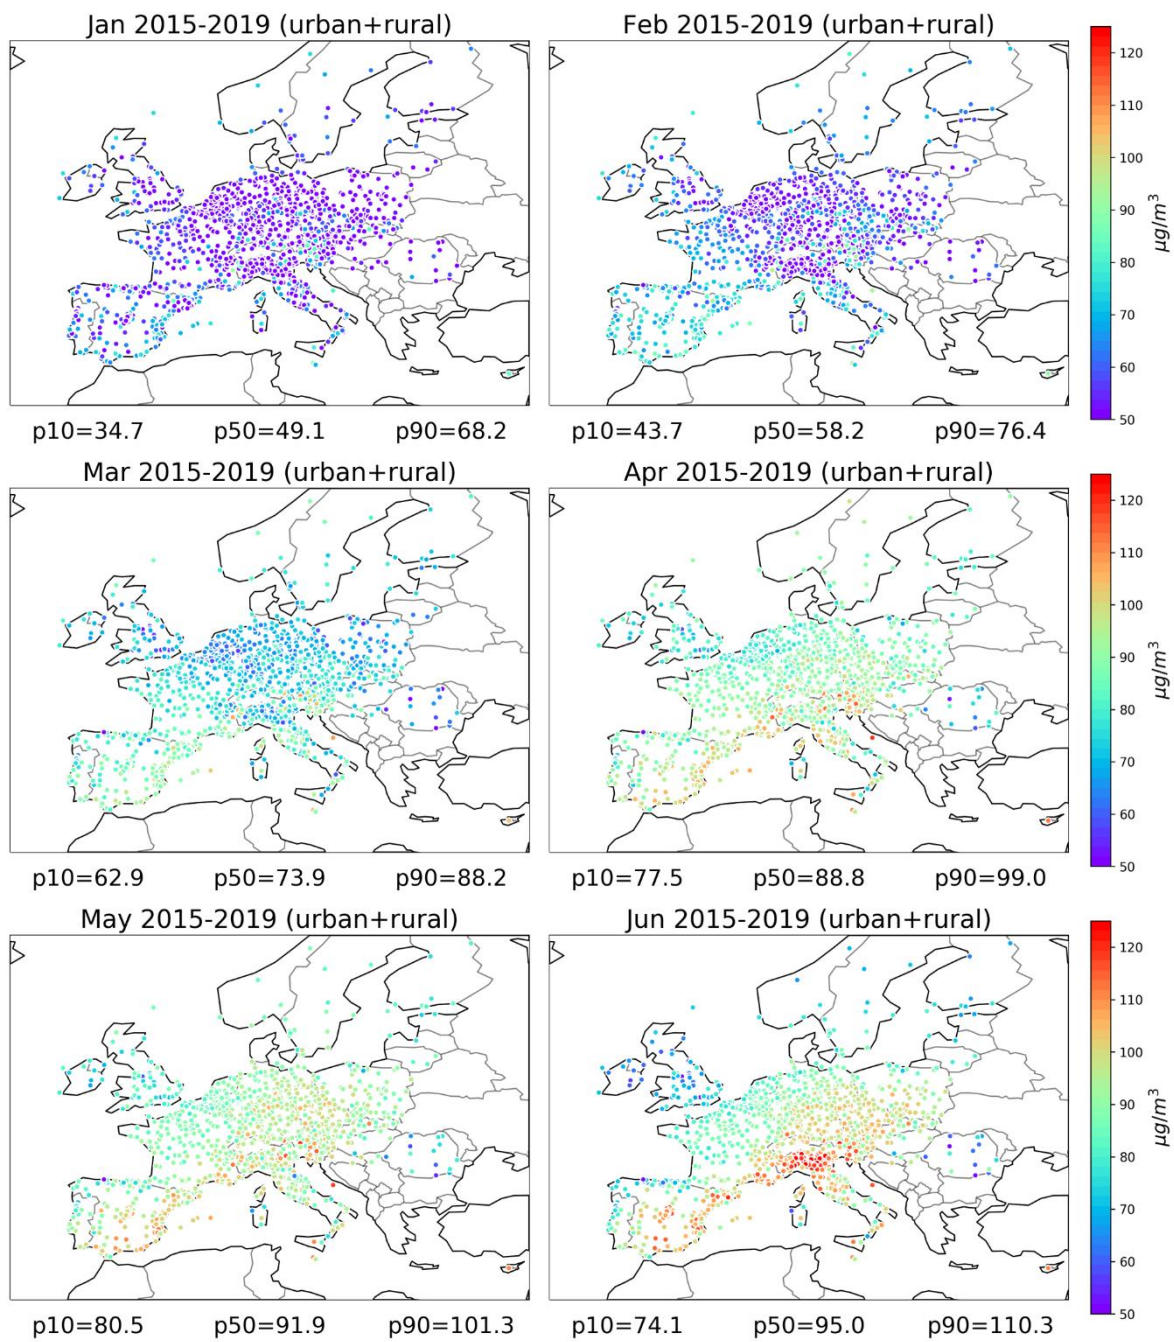

**Figure S1.** Monthly averages of MDA8 O<sub>3</sub> at background sites during 2015–2019.

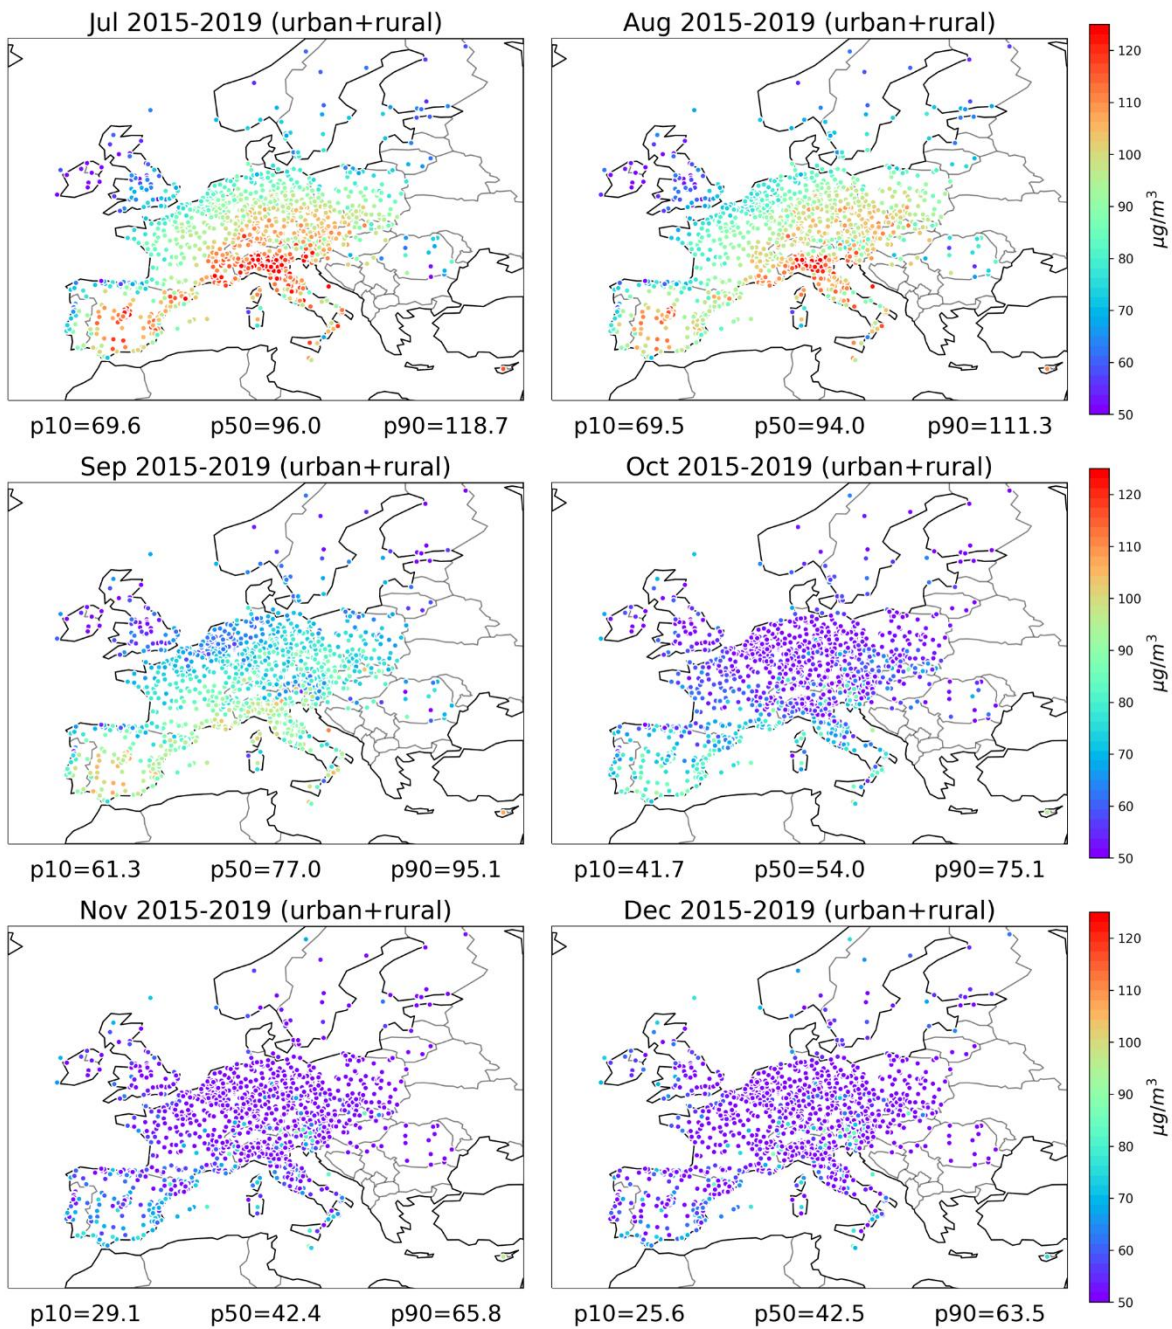

Figure S1. Continued.



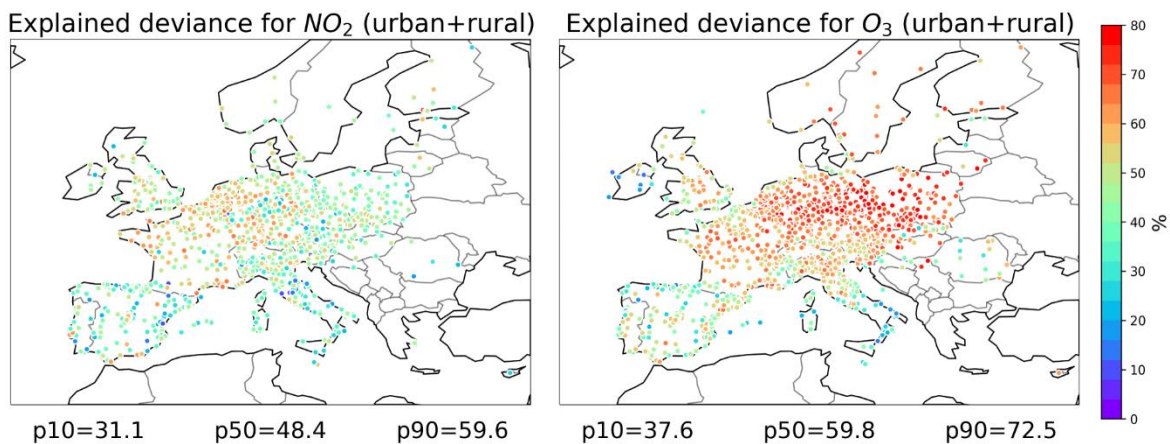

**Figure S2.** Deviance explained by the GAMs for 1-h daily maximum  $NO_2$  (left) and MDA8  $O_3$  (right) at background sites during March–April 2015–2019.

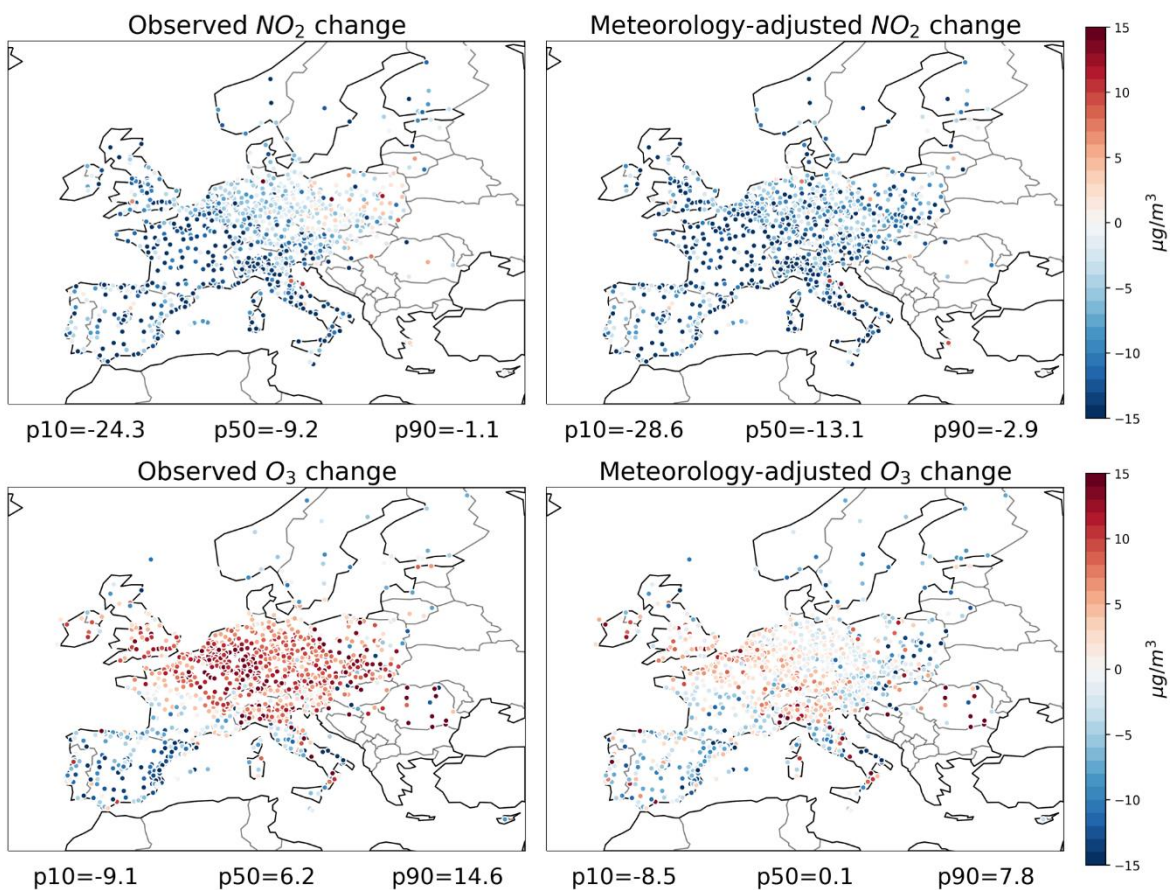

**Figure S3.** As Figure 1 of the main text but in  $\mu g/m^3$ .
